# Supplementary material for: Influence of Dispersion and Orientation on Polyamide-6 Cellulose Nanocomposites Manufactured through Liquid-Assisted Extrusion
Source: MDPI journal article supplement (doi:10.3390/nano12050818), 2022-02-28
Supplement: s1 [file s1]

Supplementary Materials

# Influence of Dispersion and Orientation on Polyamide-6 Cellulose Nanocomposites Manufactured through Liquid-Assisted Extrusion

Luísa Rosenstock Völtz <sup>1,2</sup>, Shiyu Geng <sup>1,2</sup>, Anita Teleman <sup>3</sup> and Kristiina Oksman <sup>1,2,4,\*</sup>

<sup>1</sup> Division of Materials Science, Department of Engineering Sciences and Mathematics, Luleå University of Technology, SE-97187 Luleå, Sweden; luisa.voltz@ltu.se (L.R.V.); shiyu.geng@ltu.se (S.G.)

<sup>2</sup> Wallenberg Wood Science Center (WWSC), Luleå University of Technology, SE-97187 Luleå, Sweden

<sup>3</sup> RISE Research Institutes of Sweden, SE-11486 Stockholm, Sweden; anita.teleman@ri.se

<sup>4</sup> Department of Mechanical & Industrial Engineering (MIE), University of Toronto, Toronto, ON M5S 3G8, Canada

\* Correspondence: kristiina.oksman@ltu.se

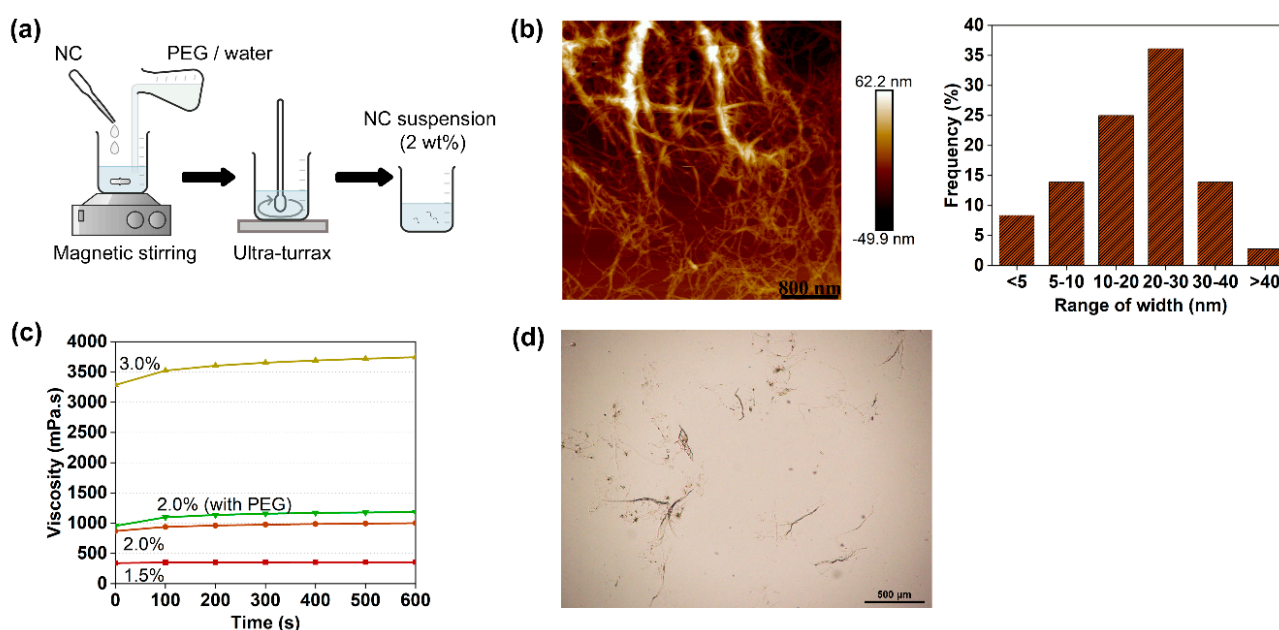

**Figure S1.** (a) NC suspension preparation by adding water and/or PEG following by magnetic stirring and ultra turrax; (b) AFM micrograph of the nanocellulose (0.01 wt.%) and width distribution of the nanocellulose; (c) viscosity versus time curves for different NC concentrations (1.5, 2 and 3 wt.% water base and 2 wt.% PEG/water base) and (d) OM image of NC suspension (0.01 wt.%), scale bar 500 μm

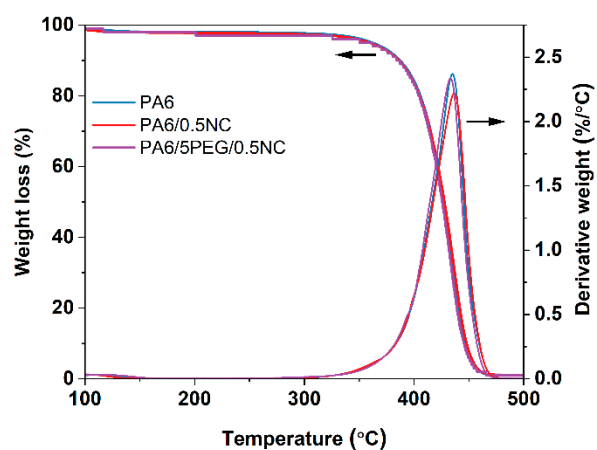

**Figure S2.** Thermogravimetric curves for PA6 and PA6-nanocomposites measured by TGA. The onset degradation temperature for PA6: 403 °C, PA6/0.5NC: 402 °C, and PA6/5PEG/0.5NC: 402 °C

**Table S1.** Degree of crystallinity ( $X_c$ ) and melting peaks measured by DSC. The samples were dried prior testing.

| Sample          | $X_c$ (%) | $T_{m1}$ (°C) | $T_{m2}$ (°C) |
|-----------------|-----------|---------------|---------------|
| PA6             | 21        | 205           | 218           |
| PA6/0.5NC       | 28        | 200           | 218           |
| PA6/5PEG/0.5NC  | 25        | 205           | 218           |
| OPA6            | 31        | 210           | 221           |
| OPA6/0.5NC      | 42        | 212           | 222           |
| OPA6/5PEG/0.5NC | 30        | 210           | 221           |

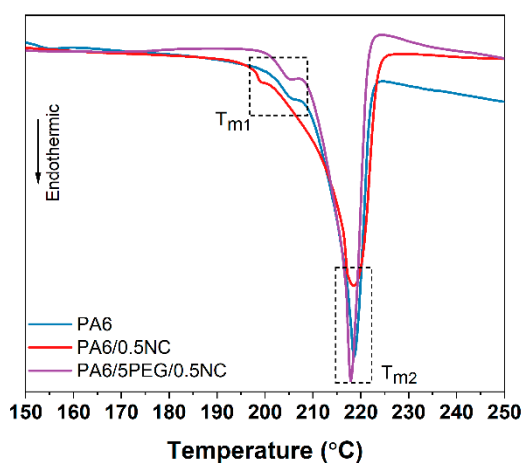

**Figure S3.** DSC curves for PA6 and PA6-nanocomposite. The double melting peaks,  $T_{m1}$  and  $T_{m2}$ , are shown in the graph

**Table S2.** Tensile properties of non-oriented PA6 and PA6-nanocomposites. The toughness was calculated by the area under the stress-strain curve

| Sample         | Strength (MPa)      | Modulus (GPa)          | Elongation at break (%) | Toughness (MJ/m <sup>3</sup> ) |
|----------------|---------------------|------------------------|-------------------------|--------------------------------|
| PA6            | 61 ± 2 <sup>A</sup> | 2.0 ± 0.1 <sup>A</sup> | 21 ± 8 <sup>A</sup>     | 11.5 ± 4.4 <sup>A</sup>        |
| PA6/0.5NC      | 60 ± 1 <sup>A</sup> | 2.3 ± 0.1 <sup>B</sup> | 19 ± 6 <sup>A</sup>     | 10.4 ± 2.9 <sup>A</sup>        |
| PA6/5PEG/0.5NC | 52 ± 1 <sup>B</sup> | 1.4 ± 0.1 <sup>C</sup> | 63 ± 4 <sup>B</sup>     | 29.5 ± 2.5 <sup>B</sup>        |

<sup>A,B,C</sup> Marked with the same letter within the same column are not significantly different at a 5% significance level based on ANOVA and Tukey's Test.

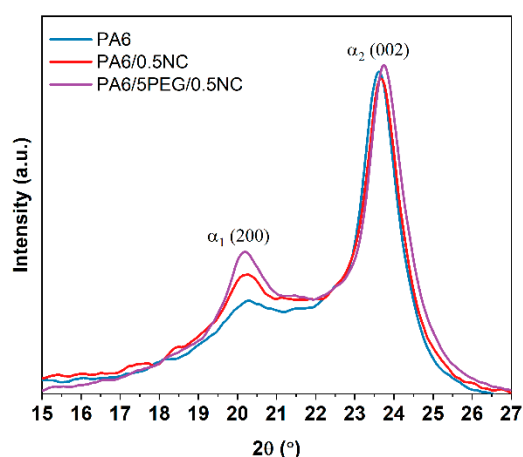**Figure S4.** 1D-XRD for PA6 and PA6-nanocomposite. The first peak around 20.2° is related to  $\alpha_1$  crystals (200) and the second peak around 23.7° to  $\alpha_2$  crystals (002)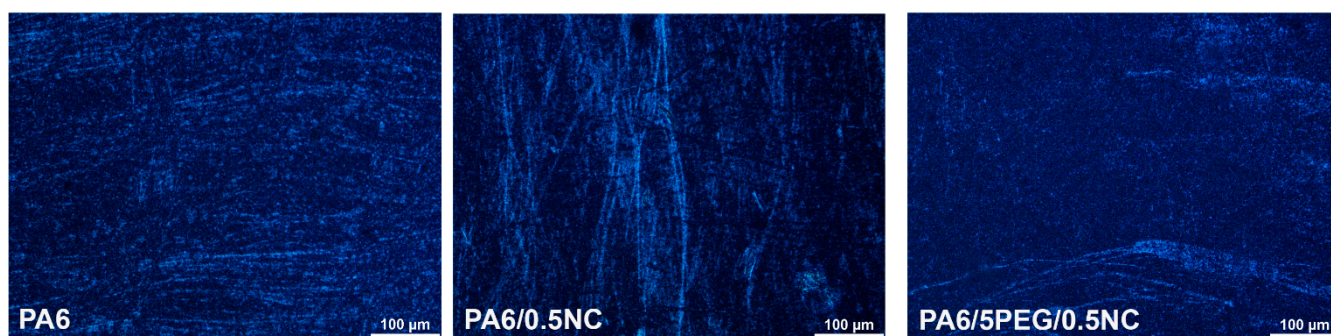**Figure S5.** POM using hot-stage (220 °C) for PA6 and PA6-nanocomposites at 90 seconds (scale bar 100 μm).

**Table S3.** Tensile properties of oriented PA6 and PA6-nanocomposites. The toughness was calculated by the area under the stress-strain curve

| Sample          | Strength (MPa)       | Modulus (GPa)            | Elongation at break (%) | Toughness (MJ/m <sup>3</sup> ) |
|-----------------|----------------------|--------------------------|-------------------------|--------------------------------|
| OPA6            | 203 ± 5 <sup>A</sup> | 2.6 ± 0.1 <sup>A</sup>   | 24 ± 4 <sup>A</sup>     | 34.0 ± 7.6 <sup>A</sup>        |
| OPA6/0.5NC      | 215 ± 7 <sup>B</sup> | 3.0 ± 0.2 <sup>B</sup>   | 18 ± 3 <sup>B</sup>     | 24.3 ± 6.2 <sup>B</sup>        |
| OPA6/5PEG/0.5NC | 221 ± 5 <sup>B</sup> | 2.8 ± 0.2 <sup>A/B</sup> | 23 ± 1 <sup>A</sup>     | 33.6 ± 3.4 <sup>A/B</sup>      |

<sup>A,B,C</sup> Marked with the same letter within the same column are not significantly different at a 5% significance level based on ANOVA and Tukey's Test.

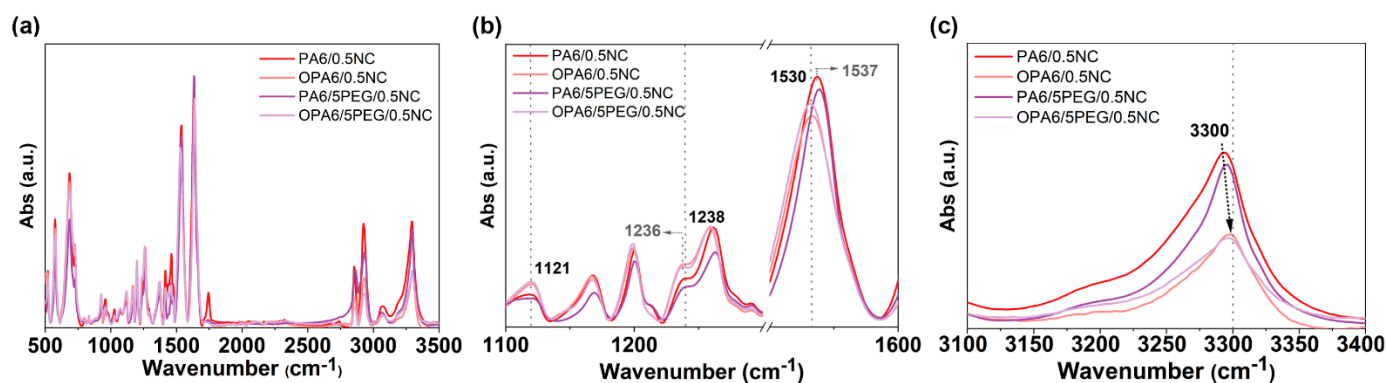**Figure S6.** FT-IR spectra for PA6-nanocomposites and OPA6-nanocomposites, (a) FTIR spectra from 500 to 3500 cm<sup>-1</sup>; (b) from 1100 to 1600 cm<sup>-1</sup>; and (c) from 3100 to 3400 cm<sup>-1</sup>.**Table S4.** Apparent crystallite size and diffraction angles measured by 1D-XRD scattering patterns

| Sample          | Crystallite size (nm) | 2θ <sub>1</sub> (°) | 2θ <sub>2</sub> (°) |
|-----------------|-----------------------|---------------------|---------------------|
| PA6             | 5.32                  | 20.3                | 23.6                |
| PA6/0.5NC       | 7.79                  | 20.2                | 23.7                |
| PA6/5PEG/0.5NC  | 6.70                  | 20.2                | 23.8                |
| OPA6            | 3.88                  | 20.6                | 23.2                |
| OPA6/0.5NC      | 4.50                  | 20.5                | 23.1                |
| OPA6/5PEG/0.5NC | 2.64                  | 20.5                | 23.3                |

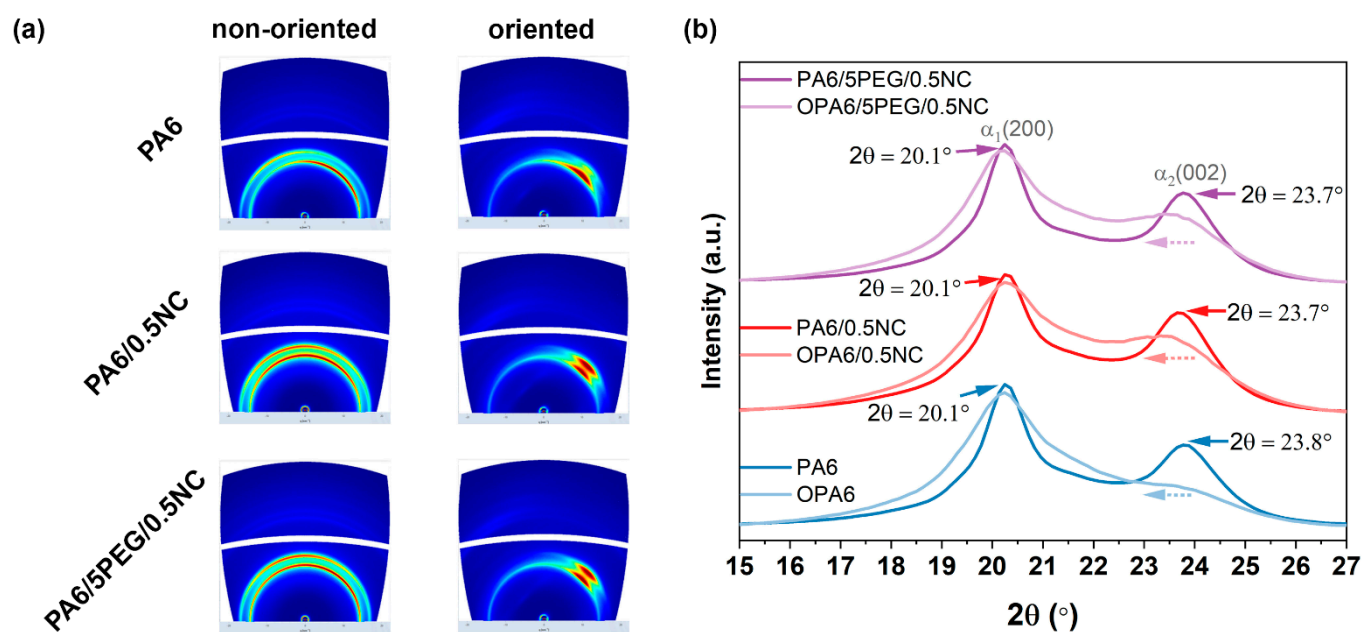

**Figure S7.** (a) 2D-WAXS diffractograms and (b) 2D-XRD scattering pattern for PA6 and PA6-nanocomposites before and after SSD

**Table S5.** Orientation index for crystalline PA6 in the composites, as estimated from WAXS measurements. If all crystalline PA6 is aligned in the same direction,  $f_c = 1$ , and if it is randomly distributed,  $f_c = 0$

| Sample         | Orientation index, $f_c$ <sup>1</sup> |            |
|----------------|---------------------------------------|------------|
|                | Non-oriented                          | Oriented   |
| PA6            | 0.60; 0.53                            | 0.82; 0.83 |
| PA6/0.5NC      | 0.32; 0.37                            | 0.84; 0.84 |
| PA6/5PEG/0.5NC | 0.39; 0.42                            | 0.86; 0.85 |

<sup>1</sup> Azimuthal integration of the  $\gamma(001)(200)$ ,  $\alpha(200)$  and  $\alpha(002)$  scattering planes,  $2\theta = 20.1 \pm 0.4^\circ$ ;  $23.7 \pm 0.4^\circ$ .
